# Supplementary material
Source: PubMed Central journal article supplement (PMC2922608)
Supplement: 0914281107_pnas.200914281SI.pdf [file 0914281107_pnas.200914281SI.pdf]

# Supporting Information

Miki et al. 10.1073/pnas.0914281107

## SI Text

In this supporting information, we first explain how to derive the conditions for persistence, microbial coexistence, and negative plant–soil feedback (PSF) at steady-state (Section 1 and Tables S2 and S3). On the basis of these derivations, we show supplemental results of Figs. 2 and 3 (Fig. S2). Second, we show the robustness of the buffering effect of microbial diversity on nutrient pool size, regardless of microbial food web structures (Section 2 and Fig. S1). Third, we show how parameters related to plant functions (primary production and litter production) and microbial functions (decomposition and immobilization) affect the roles of microbial diversity in facilitating negative PSF (Section 3 and Figs. S3 and S4). Fourth, we show a typical example of the time-evolution of the plant–microbe–soil feedback (PMSF) system, to demonstrate how microbial diversity facilitates plant species coexistence (Section 4 and Fig. S5). Finally, we show the global impact of PMSF on the plant and microbial community compositions (Section 5 and Fig. S6).

**Section 1: Deriving Conditions for Persistence, Microbial Coexistence, and Negative PSF.** For each equilibrium in a system with a single plant species  $P_i$  ( $i = L$  or  $N$ ) and a single microbial group  $M_j$  ( $j = R$  or  $S$ ), we obtain the following quadratic equation for the equilibrium nutrient level  $N^*$ ,

$$0 = \left(1 + \frac{a_i f_i}{m'_{M_j}}\right) N^{*2} + \left\{b_i - T_N + \frac{m'_{M_j}}{c_D} \left(\frac{f_i}{k_{R_j}} + \frac{1-f_i}{k_{S_j}}\right) + \frac{m_P}{m'_{M_j}} \left(b_i - \frac{a_i}{r_i}\right)\right\} N^* - \frac{b_i m_P}{r_i} \left(1 + \frac{m_P}{m'_{M_j}}\right) \equiv F_{P_i M_j}(N^*),$$

which has a unique positive root. This derivation reveals that the ratio of microbial mortality and immobilization efficiency ( $1/m'_{M_j} \equiv e_{M_j}/m_{M_j}$ ) determines nutrient cycling: both the lower mortality and higher immobilization efficiency imply the higher “immobilization capacity” of microbes. We also obtain the equilibrium values of the other components,

$$P_i^* = 1 - \frac{m_P}{r_i N^*}, \quad D_R^* = \frac{m'_{M_j} f_i}{c_D k_{R_j}}, \quad D_S^* = \frac{m'_{M_j} (1-f_i)}{c_D k_{S_j}}, \quad \text{and}$$

$$M_j^* = \frac{b_i m_P + a_i N^*}{m'_{M_j}} \left(1 - \frac{m_P}{r_i N^*}\right)$$

We calculate the persistence condition for the equilibrium with  $P_i$  and  $M_j$  (i.e.,  $N^* > m_P/r_i$ ) from the inequality  $F_{P_i M_j}(m_P/r_i) < 0$ , as  $f_i > f_{P_i M_j}^E$  (Table S2). This is the condition for positive equilibria (i.e., a persistence condition). The system cannot persist when starting from lower litter decomposability than these thresholds, that is, if  $f_L < f_{P_L M_R}^E$  ( $\approx 0.45$ ) or  $f_N < f_{P_N M_R}^E$  ( $\approx 0.44$ ), as shown in Figs. 3 and 4A.

For the equilibrium with  $P_i$ ,  $M_R$ , and  $M_S$ , we obtain the following quadratic equation for the equilibrium nutrient level  $N^*$ ,

$$0 = \left[1 + a_i \left\{\frac{(k_{SS} - k_{SR})f_i}{k_{SS}m'_{MR} - k_{SR}m'_{MS}} + \frac{(k_{RR} - k_{RS})(1-f_i)}{-k_{RS}m'_{MR} + k_{RR}m'_{MS}}\right\}\right] N^{*2} + \left[b_i - T_N + \frac{(k_{RR} - k_{SR})m'_{MS} - (k_{RS} - k_{SS})m'_{MR}}{c_D(k_{RR}k_{SS} - k_{RS}k_{SR})}\right] + m_P \left(b_i - \frac{a_i}{r_i}\right) \left\{\frac{(k_{SS} - k_{SR})f_i}{k_{SS}m'_{MR} - k_{SR}m'_{MS}} + \frac{(k_{RR} - k_{RS})(1-f_i)}{-k_{RS}m'_{MR} + k_{RR}m'_{MS}}\right\} N^* - \frac{b_i m_P}{r_i} \left[1 + m_P \left\{\frac{(k_{SS} - k_{SR})f_i}{k_{SS}m'_{MR} - k_{SR}m'_{MS}} + \frac{(k_{RR} - k_{RS})(1-f_i)}{-k_{RS}m'_{MR} + k_{RR}m'_{MS}}\right\}\right] \equiv F_{P_i M_R M_S}(N^*),$$

noting that it has unique positive root. We also obtain the equilibrium values of the other components,

$$P_i^* = 1 - \frac{m_P}{r_i N^*}, \quad D_R^* = \frac{k_{SS}m'_{MR} - k_{SR}m'_{MS}}{c_D(k_{RR}k_{SS} - k_{RS}k_{SR})},$$

$$D_S^* = \frac{-k_{RS}m'_{MR} + k_{RR}m'_{MS}}{c_D(k_{RR}k_{SS} - k_{RS}k_{SR})},$$

$$M_R^* = (b_i m_P + a_i N^*) P_i^* \left\{\frac{k_{SS} f_i}{k_{SS} m'_{MR} - k_{SR} m'_{MS}} - \frac{k_{SS} (1-f_i)}{-k_{RS} m'_{MR} + k_{RR} m'_{MS}}\right\}, \quad \text{and}$$

$$M_S^* = (b_i m_P + a_i N^*) P_i^* \left\{-\frac{k_{SR} f_i}{k_{SS} m'_{MR} - k_{SR} m'_{MS}} + \frac{k_{RR} (1-f_i)}{-k_{RS} m'_{MR} + k_{RR} m'_{MS}}\right\}$$

At this equilibrium, the persistence condition for plants ( $N^* > m_P/r_i$ ) calculated from  $F_{P_i M_R M_S}(m_P/r_i) < 0$  is equivalent to  $\frac{(k_{RR} - k_{SR})m'_{MS} - (k_{RS} - k_{SS})m'_{MR}}{c_D(k_{RR}k_{SS} - k_{RS}k_{SR})} < T_N - \frac{m_P}{r_i}$ . For a nonzero biomass of organic nutrients ( $D_R^*$  and  $D_S^*$ ),  $k_{SS}m'_{MR} - k_{SR}m'_{MS}$  and  $k_{RS}m'_{MR} - k_{RR}m'_{MS}$  should be positive. For a nonzero biomass of microbes ( $M_R^*$  and  $M_S^*$ ), the inequality  $f_{M_R \rightarrow P_i M_S}^* < f_i < f_{M_S \rightarrow P_i M_R}^*$  should be satisfied (Table S2), which requires  $f_{M_R \rightarrow P_i M_S}^* < f_{M_S \rightarrow P_i M_R}^*$ . Note that some of these conditions are not satisfied in region  $X_M$  in Fig. S3 and S4.

The condition for  $P_L$  or  $P_N$  to yield a negative PSF (i.e.,  $N^* < N_L^{**}$  or  $N^* > N_N^{**}$ ) is obtained from  $F_{P_L M_j}(N_L^{**}) > 0$  or  $F_{P_N M_j}(N_N^{**}) < 0$ , respectively, in a system with a single microbe  $M_j$ . We use the same method in a system with two microbes by focusing on  $F_{P_i M_R M_S}(N^*)$ . With this method, we can obtain the threshold values that separate positive and negative PSF (Tables S2 and S3). From the coefficients of the quadratic equation for  $N^*$ , we also find that  $N^*$  always increases with the litter decomposability  $f_i$  in a system with  $P_i$  and  $M_j$ . However, for a system

with  $P_i$ ,  $M_R$ , and  $M_S$ ,  $N^*$  increases with  $f_i$  for  $m'_{MR} > m'_{MS}$ , decreases with  $f_i$  for  $m'_{MR} < m'_{MS}$ , or is not affected by  $f_i$  for  $m'_{MR} = m'_{MS}$ . This is why the conditions for a negative PSF in a system with  $P_i$ ,  $M_R$ , and  $M_S$  depend on the difference between  $m'_{MR}$  and  $m'_{MS}$ . When both plant species cause a negative PSF, the two species are likely to coexist for a system with one or two microbial groups, respectively (Tables S2 and S3).

To understand how plant litter decomposability affects the competitive outcome in the microbial community, we investigated the condition for  $D_R$ -preferring microbes to successfully invade the system under equilibrium with a single plant species  $P_i$  and  $D_S$ -preferring microbes  $M_S$ . The invasion succeeds ( $[\frac{1}{M_R} \frac{dM_R}{dt}]_{P_i=P_i^*, M_S=M_S^*} > 0$ ) when a fraction  $f_i$  of rapidly decomposable organic nutrient ( $D_R$ ) in the litter from  $P_i$  is sufficiently high ( $f_i > f_{M_R \rightarrow P_i M_S}^{**}$ ) (Table S2), which can be analytically derived from the equilibrium. Similarly,  $D_S$ -preferring microbes can invade the system under the equilibrium with plant species  $i$  and  $D_R$ -preferring microbes when a fraction  $f_i$  is sufficiently small ( $f_i < f_{M_S \rightarrow P_i M_R}^{**}$ ). If we focus on a reasonable situation ( $0 < f_{M_R \rightarrow P_i M_S}^{**} < f_{M_S \rightarrow P_i M_R}^{**} < 1$ ), we obtain the coexistence condition for microbes (Table S2), noting that this condition is equivalent to the nonzero biomass of two microbes in the equilibrium with plant species  $i$  and two microbes.

In addition, by solving  $F_{P_L M_j}(N^*) = 0$  and  $F_{P_L M_R M_S}(N^*) = 0$ , we can plot the relationship between the litter decomposability  $f_L$ , nutrient pool size, biomass of detritus, and relative abundance of  $M_R$  (Fig. 2A and B). The relationship between  $f_L$  and  $N^*$  with  $m'_{MR} \neq m'_{MS}$  is shown in Fig. S24, indicating the buffering effect of microbial diversity on the nutrient pool size. Similarly, by setting a specific parameter set (default values in Table S1), we can calculate the threshold values shown in Tables S2 and S3 and drawn in Fig. 3 (main text). With another set of parameters ( $e_{MR} = e_{MS} = 0.45$ ), we can show that the reduction of  $N^*$  by the dominance of  $M_R$  shifts the sign of PSF from positive to negative in a system with  $P_L$  with high decomposability (shaded range in Fig. S2B). However, simultaneously, such a reduction of  $N^*$  by the presence of  $M_R$  can also shift the sign of PSF from negative to positive in a system of  $P_N$  with high decomposability (shaded range in Fig. S2C).

Although it would also be valuable to derive the invasion conditions for the competing microbial group in the equilibrium with two plant species, it is difficult to analytically derive simple conditions for this scenario, such as those shown in Table S2. Similarly, it is difficult to analytically derive the equilibrium with  $P_L$ ,  $P_N$ ,  $M_R$ , and  $M_S$ . Realization of these equilibria was checked as a part of the numerical calculations [Fig. 4 (main text) and Fig. S6].

**Section 2: Plant Control of Nutrient Pool Size Under Various Microbial Food Web Structures.** In Fig. 2A, the nutrient pool size is not tightly coupled with plant litter decomposability when two microbial functional groups coexist with a single plant species. We checked the robustness of this prediction under various microbial food web structures. In place of Eqs. 5 and 6, we used the following equations for the microbial dynamics ( $M_j$ ), microbial consumers ( $C_j$ ), and top predator ( $C_T$ ) on the consumers. Nonassimilated parts of the nutrients by trophic interactions are assumed to be mineralized into the nutrient pool ( $N$ ), such that the total amount of nutrient in the system is kept constant (i.e.,  $b_L P_L + b_N P_N + D_R + D_S + M_R + M_S + C_R + C_S + C_T + N = \text{const} \equiv T_N$ ). With these assumptions, we obtain:

$$dM_j/dt = c_{D E M_j}(k_{Rj} D_R + k_{Sj} D_S) M_j - l_{M_j} \quad (j = R, S)$$

$$dC_j/dt = g_{C_j} - l_{C_j} \quad (j = R, S)$$

$$dC_T/dt = g_{C_T} - l_{C_T}$$

where  $l_{M_j}$ ,  $l_{C_j}$ , and  $l_{C_T}$  are loss terms by predation, and  $g_{C_j}$  and  $g_{C_T}$  are growth terms.

Four distinct types of microbial food webs are prepared: (i)  $M_R$  and  $M_S$  only, (ii)  $M_R$  and  $M_S$  with a generalist consumer  $C_R$  that utilizes both  $M_R$  and  $M_S$ , (iii)  $M_R$  and  $M_S$  with specialist consumers  $C_R$  and  $C_S$  for each, and (iv)  $M_R$  and  $M_S$ , specialist consumers  $C_R$  and  $C_S$ , and generalist top predator  $C_T$ . Case (i) has the same settings as Fig. 2A (main text). For trophic interactions between microbes ( $M_j$ ) and consumers ( $C_j$ ), we assume a Lotka-Volterra (LV) or a donor-controlled (DC) interaction type. For LV, the loss term  $l_{M_j}$  is proportional to the product of the microbial biomass and the corresponding consumer. For DV, the loss term is proportional to the microbial biomass. The DC interaction would realistically represent the trophic interaction between fungi and their consumers in soil (i.e., for  $M_S$  in our model), because fungal biomasses tend to be controlled from the bottom up (1). We prepared all possible combinations for LV and DC interactions (Fig. S1). For example, in “DC-LV” scenarios (Fig. S1), the loss terms  $l_{MR}$  and  $l_{MS}$  are determined as DC and LV, respectively. For trophic interactions between microbial consumers and the top predator, we assumed LV interactions.

The relative abundance of  $D_R$ -preferring microbes ( $M_R/[M_R + M_S]$ ) with a higher preference for readily decomposable litter increases with plant litter quality ( $f_L$ ), regardless of the microbial food web structure. The nutrient pool size correlates poorly with litter quality in a system with functional microbial diversity compared with a system with single microbial groups (Fig. S1 A–E, I, M) or the availability falls to intermediate levels (Fig. S1 H and L), suggesting the buffering effect of the microbial diversity. Although exceptions are shown in Fig. S1 F, G, J, and K, where the nutrient pool size is largest in a system with microbial diversity, the responses of this microbial community structure are unrealistic; the relative abundance of  $M_R$  does not change with litter quality (Fig. S1 F and J) or  $M_R$  does not dominate the community with a very high litter quality (Fig. S1 G and K). These results demonstrate that the buffering effect of the functional microbial diversity on the plant litter control of the nutrient pool size is a robust prediction under the reasonable assumption that  $D_S$ -preferring microbes  $M_S$  (e.g., fungi) are donor controlled (Fig. S1 D, E, H, I, L, and M).

**Section 3: Parameter Dependence of the Region for Litter Decomposabilities to Cause a Negative PSF in a System with Microbial Diversity.** To check whether a system with microbial functional diversity is more likely to cause a negative PSF than a system without microbial diversity, we numerically evaluate the ranges of litter decomposabilities ( $f_L$  and  $f_N$ ) that cause a negative PSF. Using the threshold values shown in Tables S2 and S3, we calculate these ranges for systems with a single microbial group  $M_R$  or  $M_S$ , and for a system with microbial diversity. For each system with  $P_i$ ,  $M_R$ , and/or  $M_S$ , we define  $\Delta f_{i,X} = \max[0, f_{i,X,\max} - f_{i,X,\min}]$ , where plant species  $i$  ( $= L$  or  $N$ ) causes a negative PSF when  $f_{i,X,\min} < f_i < f_{i,X,\max}$  in a system with  $M_R$  only,  $M_S$  only, or both  $M_R$  and  $M_S$  ( $X = R, S$ , or  $RS$ , respectively). A larger  $\Delta f_{i,X}$  indicates that a negative PSF is more likely to occur.

We also define two indices for evaluating the roles of microbial diversity in enhancing negative PSF,  $\theta_{i,SF} = \Delta f_{i,RS} - \max(\Delta f_{i,R}, \Delta f_{i,S})$  and  $\theta_{i,MF} = \Delta f_{i,RS} - (\Delta f_{i,R} + \Delta f_{i,S})/2$ , where  $i = L$  or  $N$ . When  $\theta_{i,SF}$  is positive, the microbial functional diversity broadens the region for which  $f_i$  can cause a negative PSF in the  $P_i$ -dominant plant community, implying a strong facilitation of negative PSF. When  $\theta_{i,MF}$  is positive, the likelihood of a negative PSF occurring in a system with microbial diversity ( $\Delta f_{i,RS}$ ) is larger than expected in a hypothetical system whereby two microbial groups equally affect the sign of PSF ( $(\Delta f_{i,R} + \Delta f_{i,S})/2$ ). We define this state as a moderate level of facilitation. The aim here is to check the parameter sensitivity of  $\theta_{i,SF}$  and  $\theta_{i,MF}$ .

It is ecologically reasonable to exclude parameter values for which the equilibrium with two microbial groups does not exist for either of the plant species with any litter decomposability ( $0 \leq f_i \leq 1$ ). Similarly,

it is not meaningful to evaluate  $\theta_{i,SF}$  and  $\theta_{i,MF}$  when  $\Delta f_{i,RS} = \Delta f_{i,R} = \Delta f_{i,S} = 0$  or  $\Delta f_{i,RS} = \Delta f_{i,R} = \Delta f_{i,S} = 1$ , because the sign of PSF is independent of the litter decomposability and microbial community composition in these cases. The pseudocode for checking the parameter dependence of  $\theta_{i,SF}$  and  $\theta_{i,MF}$  is:

1. Assign a new parameter set;
2. Check whether “Persistent conditions for a system with  $P_L$ ,  $M_R$  and  $M_S$ ” (Table S2) is satisfied for both of  $P_L$  and  $P_N$ ; if satisfied, go to step 3; if not, categorize the parameter set as “**X<sub>M</sub>**” and go back to step 1;
3. Check whether  $\Delta f_{L,RS} = \Delta f_{L,R} = \Delta f_{L,S} = 0$  or 1, and  $\Delta f_{N,RS} = \Delta f_{N,R} = \Delta f_{N,S} = 0$  or 1; if both are satisfied, categorize the parameter set as “**X<sub>P</sub>**” and go back to step 1; if not, go to step 4;
4. Calculate  $\Delta f_{i,X}$  where  $i = L$  or  $N$  and  $X = R, S$ , or  $RS$  according to the following algorithm;

$$\Delta f_{L,X} = \max\left[0, \min\left(f_{P_N \rightarrow P_L M_X}^{**}, 1\right) - \max\left(0, f_{P_L M_X}^E\right)\right] \text{ for } X = R \text{ or } S;$$

$$\Delta f_{N,X} = \max\left[0, 1 - \max\left(0, f_{P_N M_X}^E, f_{P_N M_X}^{**}\right)\right] \text{ for } X = R \text{ or } S;$$

$$\Delta f_{L,RS}^S = \max\left[0, \min\left(f_{M_R \rightarrow P_L M_S}^{**}, f_{P_N \rightarrow P_L M_S}^{**}, 1\right) - \max\left(0, f_{P_L M_S}^E\right)\right];$$

$$\text{If } m'_{MR} < m'_{MS}, \Delta f_{L,RS}^C = \max\left[0, \min\left(f_{M_S \rightarrow P_L M_R}^{**}\right) - \max\left(0, f_{P_N \rightarrow P_L M_R M_S}^{**}, f_{M_R \rightarrow P_L M_S}^{**}\right)\right];$$

$$\text{If } m'_{MR} = m'_{MS} \text{ and } \Phi_{P_N \rightarrow P_L M_R M_S}^{**} < 0,$$

$$\Delta f_{L,RS}^C = \max\left[0, \min\left(f_{M_S \rightarrow P_L M_R}^{**}, 1\right) - \max\left(0, f_{M_R \rightarrow P_L M_S}^{**}\right)\right];$$

$$\text{If } m'_{MR} = m'_{MS} \text{ and } \Phi_{P_N \rightarrow P_L M_R M_S}^{**} \geq 0, \Delta f_{L,RS}^C = 0;$$

$$\text{If } m'_{MR} > m'_{MS}, \Delta f_{L,RS}^C = \max\left[0, \min\left(f_{M_S \rightarrow P_L M_R}^{**}, f_{P_N \rightarrow P_L M_R M_S}^{**}, 1\right) - \max\left(0, f_{M_R \rightarrow P_L M_S}^{**}\right)\right];$$

$$\Delta f_{L,RS}^R = \max\left[0, \min\left(f_{P_N \rightarrow P_L M_R}^{**}, 1\right) - \max\left(0, f_{P_L M_R}^E, f_{M_S \rightarrow P_L M_R}^{**}\right)\right];$$

$$\Delta f_{L,RS} = \Delta f_{L,RS}^S + \Delta f_{L,RS}^C + \Delta f_{L,RS}^R;$$

$$\Delta f_{N,RS}^S = \max\left[0, \min\left(f_{M_R \rightarrow P_L M_S}^{**}, 1\right) - \max\left(0, f_{P_N M_S}^E, f_{P_L \rightarrow P_N M_S}^{**}\right)\right];$$

$$\text{If } m'_{MR} < m'_{MS}, \Delta f_{N,RS}^C = \max\left[0, \min\left(f_{M_S \rightarrow P_L M_R}^{**}, f_{P_L \rightarrow P_N M_R M_S}^{**}, 1\right) - \max\left(0, f_{M_R \rightarrow P_L M_S}^{**}\right)\right];$$

$$\text{If } m'_{MR} = m'_{MS} \text{ and } \Phi_{P_L \rightarrow P_N M_R M_S}^{**} < 0$$

$$\Delta f_{N,RS}^C = \max\left[0, \min\left(f_{M_S \rightarrow P_L M_R}^{**}, 1\right) - \max\left(0, f_{M_R \rightarrow P_L M_S}^{**}\right)\right];$$

$$\text{If } m'_{MR} = m'_{MS} \text{ and } \Phi_{P_L \rightarrow P_N M_R M_S}^{**} \geq 0, \Delta f_{N,RS}^C = 0;$$

$$\text{If } m'_{MR} > m'_{MS}, \Delta f_{N,RS}^C = \max\left[0, \min\left(f_{M_S \rightarrow P_L M_R}^{**}\right) - \max\left(0, f_{M_R \rightarrow P_L M_S}^{**}, f_{P_L \rightarrow P_N M_R M_S}^{**}\right)\right];$$

$$\Delta f_{L,RS}^R = \max\left[0, 1 - \max\left(0, f_{P_N M_R}^E, f_{M_S \rightarrow P_L M_R}^{**}, f_{P_L \rightarrow P_N M_R}^{**}\right)\right];$$

$$\Delta f_{N,RS} = \Delta f_{N,RS}^S + \Delta f_{N,RS}^C + \Delta f_{N,RS}^R;$$

5. Calculate  $\theta_{i,SF}$  and  $\theta_{i,MF}$ ;
6. Define a small positive constant ZERO = 1.0e-10;
7. If  $\theta_{L,SF} > \text{ZERO}$  or  $\theta_{N,SF} > \text{ZERO}$ , categorize the parameter set as “strong facilitation (SF)”; else if  $\theta_{L,MF} > \text{ZERO}$  or  $\theta_{N,MF} > \text{ZERO}$ , categorize the parameter set as “moderate facilitation (MF)”; else, categorize the parameter set as “no facilitation (NF)”; go back to step 1.

We assume a small positive constant (step 6) to reduce the numerical error in computing  $\theta_{i,SF}$  and  $\theta_{i,MF}$ .

Using this method, we check whether the microbial functional diversity increases the likelihood of obtaining a negative PSF compared with systems without microbial diversity (Fig. S3). In region SF (or region MF), microbial diversity strongly (or moderately) facilitates a negative PSF in either in a  $P_L$ - or  $P_N$ -dominant community. In region NF, microbial diversity does not facilitate a negative PSF in either community. Fig. S3A shows that a strong facilitation of negative PSF is possible with intermediate values of microbial mortality and assimilation efficiency (i.e., intermediate levels of immobilization capacity) (region SF), whereas moderate facilitation is achieved with a wide range of parameter values (region MF). Even when differences in immobilization capacity between  $M_R$  and  $M_S$  are considered, strong or moderate facilitation is realized with a wide range of parameter values (Fig. S3B). Region NF (Fig. S3A and B), in which the facilitation of negative PSF does not occur, is realized in a very limited range of parameter values, suggesting the prevalence of the facilitation of a negative PSF by microbial diversity. Strong or moderate facilitation is also observed in a wide range of parameter values that are related to plant production (Fig. S3C, region SF + region MF). A similar pattern is observed even when interspecific differences in nutrient uptake ability ( $b_i$  and  $a_i$ ) between two plant species are considered (Fig. S3D).

We also check whether microbial diversity broadens the region where both plant species cause a negative PSF, by focusing on the quantity  $\Delta f_{L,X} \Delta f_{N,X}$  ( $X = R, S$ , or  $RS$ ). This quantity roughly corresponds to the size of the plant coexistence region C in Fig. 4 (main text). We define two indices for evaluating the roles of microbial diversity in enhancing the occurrence of negative PSF,  $\theta_{SFC} = \Delta f_{L,RS} \Delta f_{N,RS} - \max(\Delta f_{L,R} \Delta f_{N,R}, \Delta f_{L,S} \Delta f_{N,S})$ , and  $\theta_{SSC} = \Delta f_{L,RS} \Delta f_{N,RS} - \min(\Delta f_{L,R} \Delta f_{N,R}, \Delta f_{L,S} \Delta f_{N,S})$ . When  $\theta_{SFC}$  is positive, the microbial functional diversity broadens the region for the mutual negative PSF, which leads to plant coexistence. When  $\theta_{SSC}$  is negative, the region for mutual negative PSF in a system with microbial diversity is smaller than that in a system with either  $M_R$  or  $M_S$  alone, implying that microbial diversity hinders plant coexistence. The aim here is to check the parameter sensitivity of  $\theta_{SFC}$  and  $\theta_{SSC}$ .

Steps 1–4 of the pseudocode for checking the parameter dependence of  $\theta_{SFC}$  and  $\theta_{SSC}$  are the same as those of the pseudocode for drawing Fig. S3. The rest of the steps are:

5. Calculate  $\theta_{SFC}$  and  $\theta_{SSC}$ ;

6. Define a small positive constant ZERO = 1.0e-10;
7. If  $\theta_{SFC} > \text{ZERO}$ , categorize the parameter set as “strong facilitation of coexistence (SFC)”; else if  $\theta_{SSC} < -\text{ZERO}$ , categorize the parameter set as “substantial suppression of coexistence (SSC)”; else if  $-\text{ZERO} < \Delta f_{L,RS} \Delta f_{N,RS} - \Delta f_{L,R} \Delta f_{N,R} < \text{ZERO}$ , categorize the parameter set as “ $M_R$ -controlling PSF (RC)”; else if  $-\text{ZERO} < \Delta f_{L,RS} \Delta f_{N,RS} - \Delta f_{L,S} \Delta f_{N,S} < \text{ZERO}$ , categorize the parameter set as “ $M_S$ -controlling PSF (SC)”; else, categorize the parameter set as “middle case (MC)”; go back to step 1;

With this method, we can also check whether microbial functional diversity can promote plant coexistence and examine its parameter dependence (Fig. S4). In region SFC, the region for which both  $f_L$  and  $f_N$  cause a negative PSF in a system with microbial diversity is larger than that in a system with  $M_R$  or  $M_S$  alone. In region RC (or region SC), the region for which both  $f_L$  and  $f_N$  cause a negative PSF in a system with microbial diversity has almost the same size as that in a system with  $M_R$  only (or  $M_S$  only), implying that PSF is controlled by a single microbial group (see also Fig. S6 A and E). In region MC, the likelihood of plant coexistence is between that in a system with  $M_R$  only and that in a system with  $M_S$  only. Microbial diversity never appears to hinder plant coexistence, because region SSC was not seen in our range of parameter values (Fig. S4).

Fig. S4A indicates that a strong facilitation of plant coexistence is possible with intermediate values of microbial mortality and assimilation efficiency (i.e., intermediate levels of immobilization capacity) (region SFC). Even when differences in immobilization capacity between  $M_R$  and  $M_S$  are considered, such facilitation is realized in a wide range of parameter values (Fig. S4B). Fig. S4C shows that a strong facilitation of microbial diversity on plant coexistence is observed in a wide range of parameter values (region SFC). A similar pattern is observed even when we consider interspecific differences in nutrient uptake ability ( $b_i$  and  $a_i$ ) between two plant species (Fig. S4D).

**Section 4: Facilitation of Plant Coexistence Through Microbial Diversity.** The facilitation of plant coexistence by microbial diversity can be easily understood through temporal dynamics with a single microbial group (Fig. S5). Here we show examples with a specific combination of litter decomposabilities ( $f_L = 0.6$ ,  $f_N = 0.5$ ). As shown in Fig. 4 A and B (main text), either  $P_N$  or  $P_L$  dominates the community with a single microbial group  $M_R$  or  $M_S$ , respectively. However, the coexistence of two microbial groups enables the coexistence of plants (Fig. 4C). Consider a system that starts from  $M_R$  only. Without microbial diversity,  $P_N$  causes a positive PSF and prevents the invasion of  $P_L$  (at  $t = 1,000$ ; Fig. S5A). This is because  $f_N (= 0.5)$  is less than  $f_{P_L \rightarrow P_N M_S}^{**} (\approx 0.59)$ ;  $f_N$  does not satisfy the “Condition for negative PSF in a system with  $P_i$  and  $M_j$ ” (Table S2). However, because  $f_N$  satisfies the “Coexistence condition for microbes in a system with  $P_i$ ” (Table S2) ( $0.33 = f_{M_R \rightarrow P_i M_S}^{**} < f_L < f_{M_S \rightarrow P_i M_R}^{**} = 0.66$ ),  $M_S$  can invade the system and increase the nutrient pool size ( $t > 2,500$ ). With the same parameter sets as those in Fig. 4, because the “Conditions for negative PSF a system with  $P_i$ ,  $M_R$ , and  $M_S$ ” are satisfied ( $\phi_{P_i \rightarrow P_N M_R M_S} \approx -102.2 < 0$ ),  $P_L$  can invade the system and coexist with  $P_N$  ( $t > 4,000$ ). Similarly, in a system that starts from  $M_S$  only,  $P_L$  causes positive PSF and prevents the invasion of  $P_N$  (at  $t = 1,000$ , Fig. S5B). This is because  $f_L (= 0.6)$  is greater than  $f_{P_N \rightarrow P_L M_S}^{**} (\approx 0.49)$  and does not satisfy the “Condition for negative PSF in a system with  $P_i$  and  $M_j$ ” (Table S2). However, once  $M_R$  invades the system ( $t > 2,500$ ), it reduces the nutrient pool size and  $P_N$  can invade the system and coexist with  $P_L$  ( $t > 4,000$ ). These examples demonstrate how microbial diversity facilitates plant coexistence as a consequence of PMSF.

**Section 5: Consequences of PMSF on Plant and Microbial Community Compositions.** In Fig. 4C (main text), the realized composition of the microbial community is not shown. In this section, we describe all of the consequences of PMSF on the plant and microbial community compositions, on the basis of numerical calculations (Fig. S6). The pseudocode for checking the dependence of the realized composition of plant and microbial communities on litter decomposability is:

1. Assign a new parameter set ( $f_L, f_N$ );
2. Assign one of the two initial conditions:

$$(P_L(0), P_N(0)) = (0.2, 0.0) \text{ or } (0.0, 0.2), \text{ with } (N(0), D_R(0), D_S(0), M_R(0), M_S(0)) = (0.01, 0.1, 0.1, 0.5 * [T_N - N(0) - b_L P_L(0) - b_N P_N(0) - D_R(0) - D_S(0)], 0.5 * [T_N - N(0) - b_L P_L(0) - b_N P_N(0) - D_R(0) - D_S(0)]);$$

3. Assign a minimum threshold:  $n_{MIN} = 1.0e-6$ ;
4. Simulate the time evolution of the system governed by Eqs. 1–6 by a numerical integration method (e.g., fourth-order Runge-Kutta method with a fixed interval) from  $t = 0$  to  $t = 5.0e+4$ ;
5. When  $10,000.0 < t < 10,000.1$  and when  $20,000.0 < t < 20,000.1$ , disturb the system as follows:

$$P_L(t) += n_{MIN}; P_N(t) += n_{MIN}; M_R(t) += n_{MIN}; M_S(t) += n_{MIN}; \text{ If } N(t) > 4 * n_{MIN}, \text{ then } N(t) -= 4 * n_{MIN}; \text{ Else if } D_R(t) > 4 * n_{MIN}, \text{ then } D_R(t) -= 4 * n_{MIN}; \text{ Else, } D_S(t) -= 4 * n_{MIN};$$

6. Calculate the “long-term averages” for all of the variables from  $t = 45,000$  to  $t = 50,000$ ;
7. Evaluate the community compositions of plants and microbes by checking whether the average values of  $P_L, P_N, M_R, M_S$  are greater than  $n_{MIN}$  or not, respectively;
8. Repeat steps 2–7 for another initial condition

Starting from the initial condition with a single plant species ( $P_L$  or  $P_N$ ) (step 1), the system first approaches equilibrium with dominance of the single species at  $t = 10,000$ . By adding a small disturbance (step 5), the invasibility of other combinations of plants and microbes in the system can be checked. The same type of the disturbance is added twice to avoid numerical errors and to reduce the dependence of invasion success on the invasion timing. The values of  $N, D_R,$  and  $D_S$  are adjusted to keep the total nutrient constant (step 5). By comparing the realized community compositions starting from two different initial conditions (step 2), we can check for the occurrence of bistability. This method allows us to draw Fig. 4 (main text) and Fig. S6. For a system with only  $M_R$  or  $M_S$  (Fig. 4 A and B, main text), the initial conditions (step 2) and invasion event (step 5) should be appropriately modified.

Additional explanations are needed to understand the dynamics in some regions of Fig. 4 (main text). In region X (Fig. 4A, main text) with small  $f_L$  and  $f_N$ , neither plant species can maintain its population because the litter decomposability is too low to satisfy the persistence condition for a system with  $P_i$  and  $M_j$  (see Section 1 and Table S2). In region X with a very small  $f_L$  but with a high  $f_N$ ,  $P_N$  maintains its population but allows the invasion of  $P_L$  with very low litter decomposability, resulting in collapse of the system. When  $f_N$  is lower than  $f_{P_L \rightarrow P_N M_S}^{**} (\approx 0.09)$  (Fig. 4C, main text), once  $P_N$  dominates plant community, it prevents the invasion of  $P_L$  and the system with only  $P_N$  is stable. This is why each parameter set falls into region N, region C or N, or region L or N: the dominance of  $P_N$  is always one of the stable steady states. When  $f_N$  is less than  $f_{P_L \rightarrow P_N M_S}^{**} (\approx 0.09)$  and

$f_L$  is lower than  $f_{P_N \rightarrow P_L M_R}^{**} (\approx 0.72)$ , the system with  $P_L$  allows the invasion of  $P_N$ . With  $(f_L, f_N) = (0.6, 0.05)$ , the coexistence of  $P_L$  and  $P_N$  is possible after the invasion of  $P_N$  to the system starting from only  $P_L$ , through the periodic fluctuation of nutrient pool size. However, with a slightly different parameter set,  $(f_L, f_N) = (0.6, 0.0)$ , the invasion of  $P_N$  finally excludes  $P_L$  and leads to an apparently stable equilibrium. The boundaries between region C or N and region N are not simple, probably owing to the presence or absence of periodic fluctuations.

Parts A and B, parts C and D, and parts E and F in Fig. S6 correspond to the model with  $e_{MR} = e_{MS} = 0.45, 0.6,$  and  $0.75$ , respectively. Parts A, C, and E and parts B, D, and F represent the realized community compositions of plants and microbes,

respectively. The condition for negative PSF in a system with  $M_R$  or  $M_S$  roughly determines the possibility of plant coexistence in Fig. S6 A or E, respectively. The coexistence region for  $P_L$  and  $P_N$  is separated from other regions by  $f_L = f_{P_N \rightarrow P_L M_R}^{**} (\approx 0.81)$  and  $f_N = f_{P_L \rightarrow P_N M_R}^{**} (\approx 0.72)$  in Fig. S44, and by  $f_L = f_{P_N \rightarrow P_L M_S}^{**} (\approx 0.19)$  and  $f_N = f_{P_L \rightarrow P_N M_S}^{**} (\approx -0.29)$  in Fig. S6E. This result implies that a single microbial group governs the consequences of PMSF, even if two microbial groups coexist. Conversely, in Fig. S6C the coexistence region is separated by  $f_L = f_{P_N \rightarrow P_L M_R}^{**} (\approx 0.72)$  and  $f_N = f_{P_L \rightarrow P_N M_S}^{**} (\approx 0.09)$ , implying that both of the microbial groups govern the consequences of PMSF and facilitate the coexistence of plant species, as is shown in Fig. 4C (main text).

1. Wardle DA (2002) *Community and Ecosystems: Linking the Aboveground and Belowground Components* (Princeton University Press, Princeton).

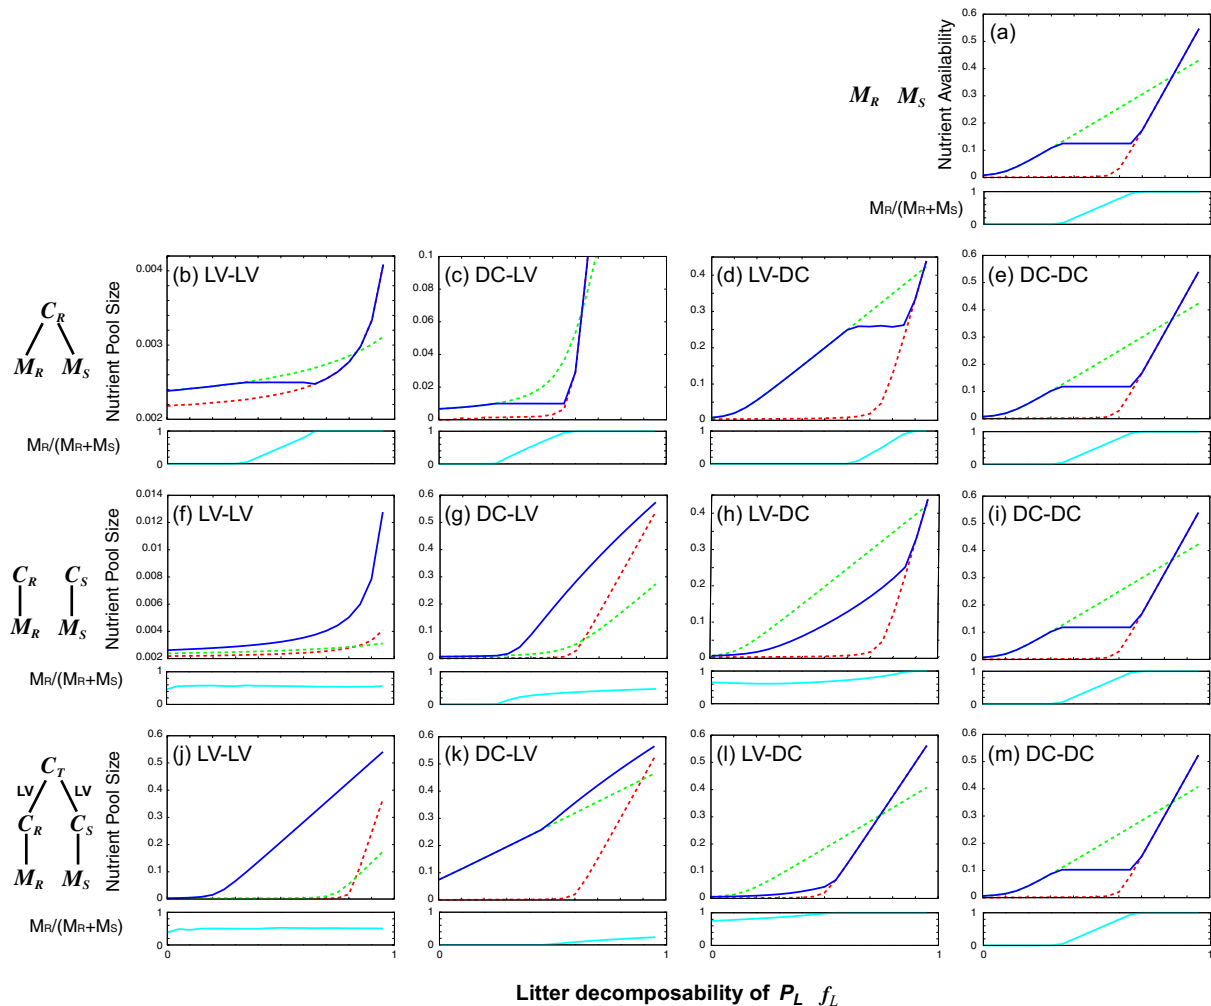

**Fig. S1.** Roles of the functional microbial diversity in the plant litter control of nutrient pool size. Nutrient pool size is calculated as the long-term average of  $N$ , because the results include those of the system under stable equilibrium and those under periodic fluctuations. Dashed red or green lines represent system results with the single microbial group  $M_R$  or  $M_S$ , respectively. System results with  $M_R$  and  $M_S$  are shown as blue lines. The equation settings and parameter values are as follows: (A)  $I_{M_j} = m_{M_j} M_j$  and  $m_{M_j} = 0.1$  for  $j = R, S$ . (B)  $I_{M_j} = m_{M_j} M_j C_L$  for  $j = R$  and  $S$ ,  $g_{CR} = e_C (I_{MR} + I_{MS})$ ,  $l_{CR} = m_{CR} C_R$  and  $m_{M_j} = 100$ ,  $e_C = 0.6$ ,  $m_{CR} = 0.1$ . (C)  $I_{MR} = m_{MR} M_R C_R$ ,  $I_{MS} = m_{MS} M_S C_S$ , and  $m_{MR} = 0.1$ ,  $m_{MS} = 20.0$ . (D)  $I_{MR} = m_{MR} M_R C_R$ ,  $I_{MS} = m_{MS} M_S$ , and  $m_{MR} = 20.0$ ,  $m_{MS} = 0.1$ . (E)  $I_{M_j} = m_{M_j} M_j C_j$  and  $m_{M_j} = 0.1$  for  $j = R, S$ . Other settings in C–E are the same as in B. (F)  $I_{M_j} = m_{M_j} M_j C_j$ ,  $g_{C_j} = e_C l_{M_j}$ ,  $l_{C_j} = m_{C_j} C_j$  and  $m_{M_j} = 100$ ,  $e_C = 0.6$ ,  $m_{C_j} = 0.1$  for  $j = R, S$ . (G)  $I_{MR} = m_{MR} M_R C_R$ ,  $I_{MS} = m_{MS} M_S C_S$ , and  $m_{MR} = 0.1$ ,  $m_{MS} = 20.0$ . (H)  $I_{MR} = m_{MR} M_R C_R$ ,  $I_{MS} = m_{MS} M_S$ , and  $m_{MR} = 20.0$ ,  $m_{MS} = 0.1$ . (I)  $I_{M_j} = m_{M_j} M_j$  and  $m_{M_j} = 0.1$  for  $j = R, S$ . Other settings in G–I are the same as in F. (J)  $I_{M_j} = m_{M_j} M_j C_j$ ,  $g_{C_j} = e_C l_{M_j}$ ,  $l_{C_j} = m_{C_j} C_j C_T$ ,  $g_{CT} = e_C (l_{CR} + l_{CS})$ ,  $l_{CT} = m_{CT} C_T$  and  $m_{M_j} = 100$ ,  $e_C = 0.6$ ,  $m_{C_j} = 20.0$ ,  $m_{CT} = 0.02$  for  $j = R, S$ . (K)  $I_{MR} = m_{MR} M_R C_R$ ,  $I_{MS} = m_{MS} M_S C_S$ , and  $m_{MR} = 0.1$ ,  $m_{MS} = 50.0$ . (L)  $I_{MR} = m_{MR} M_R C_R$ ,  $I_{MS} = m_{MS} M_S$ , and  $m_{MR} = 50.0$ ,  $m_{MS} = 0.1$ . (M)  $I_{M_j} = m_{M_j} M_j$  and  $m_{M_j} = 0.1$  for  $j = R, S$ . Other settings in K–M are the same as in J.



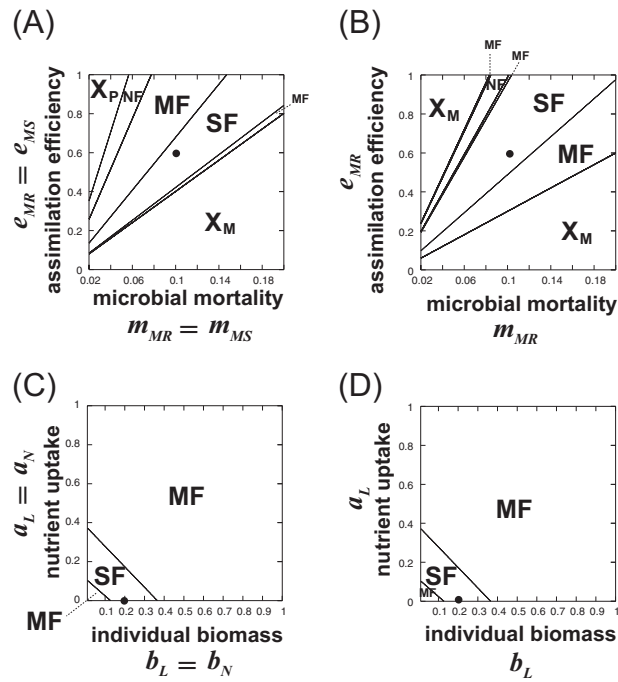

**Fig. S3.** Roles of microbial diversity in determining the sign of PSF and their dependence on parameters. The definition for each region is described in *SI Text*, Section 3. (A) The microbial mortality and assimilation efficiency of  $M_R$  are equal to those of  $M_S$ . (C) Individual biomass and nutrient uptake coefficient of  $P_L$  are equal to those of  $P_N$ . In other panels, only focal parameter values (on x and y axes) are changed, whereas other parameters are set to the default values (Table S1). For the focal parameters on x and y axes, the set of default values is shown as a closed circle in each panel.

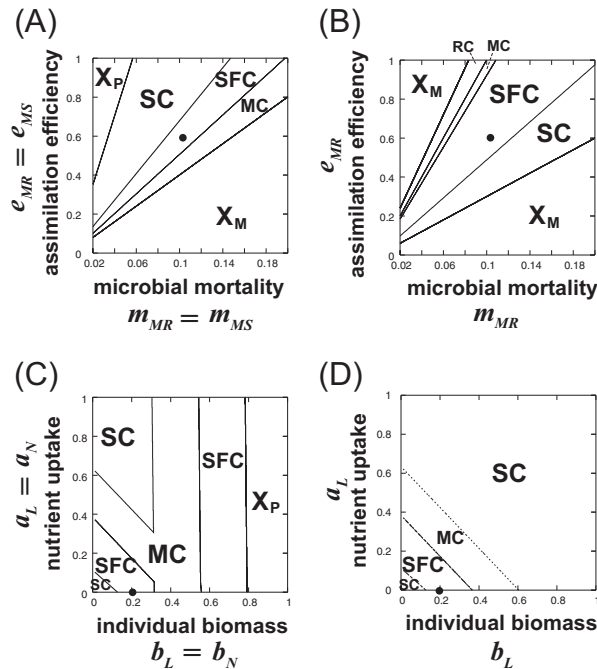

**Fig. S4.** Parameter dependence of the plant community composition during the coexistence of microbial groups. The definition for each region is described in *SI Text*, Section 3. (A) The microbial mortality and assimilation efficiency of  $M_R$  are equal to those of  $M_S$ . (C) The individual biomass and nutrient uptake coefficient of  $P_L$  are equal to those of  $P_N$ . In other panels, only focal parameter values (on x and y axes) are changed, whereas other parameters are set as the default values (Table S1). For focal parameters on x and y axes, the set of default values is shown as a closed circle in each panel.

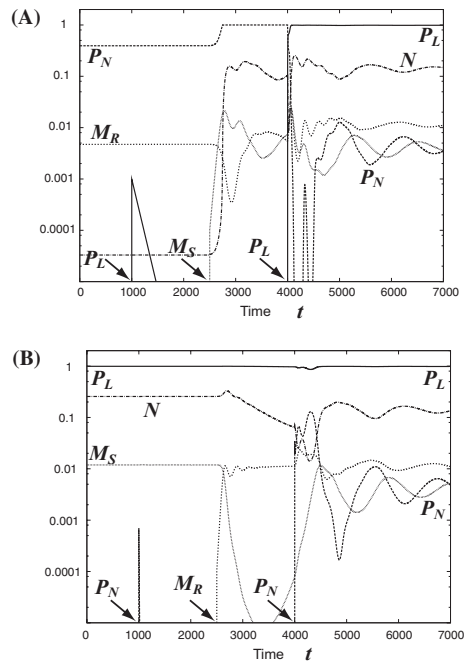

**Fig. S5.** Plant coexistence realized with microbial diversity. (A) The system starts from the equilibrium with  $P_N$  and  $M_R$ , which prevents the invasion of  $P_L$ . (B) The system starts from the equilibrium with  $P_L$  and  $M_S$ , which prevents the invasion of  $P_N$ . A combination of species-specific litter decomposability is set as  $(f_L, f_N) = (0.6, 0.5)$ . Others parameters are the same as default values (Table S1).



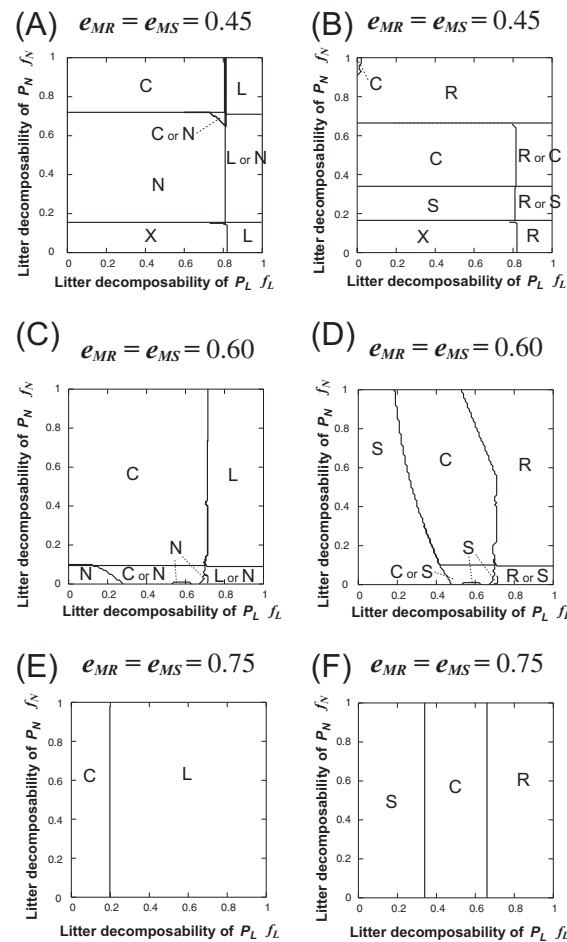

**Fig. S6.** Consequences of PMSF in plant and microbial communities, depending on the plant litter decomposability ( $f_L$  and  $f_N$ ). Regions X, L, N, C, C or N, and L or N in A, C, and E correspond to the regions defined in Fig. 4 (main text). A distinct plant community composition is realized in each region. Regions X, R, S, C, C or S, and R or S in B, D, and F represent no persistence of microbial community, dominance of  $M_R$ , dominance of  $M_S$ , coexistence of  $M_S$  and  $M_R$ , microbial coexistence or dominance of  $M_S$  depending on initial conditions, and dominance of  $M_R$  or dominance of  $M_S$  depending on initial conditions, respectively. In bistable regions (e.g., in a combination of region L or N and region R or C), either dominance of  $P_L$  with dominance of  $M_R$  or dominance of  $P_N$  with coexistence of  $M_R$  and  $M_S$  is realized, depending on initial conditions. Parameters are  $e_{MR} = e_{MS} = 0.45$ , 0.6, and 0.75 for A and B, for C and D, and for E and F, respectively. Others are the same as in Table S1.

**Table S1.** List of parameters, assumptions, and default values

| Symbol   | Definition                                     | Assumption                          | Unit                            | Default value |
|----------|------------------------------------------------|-------------------------------------|---------------------------------|---------------|
| $r_L$    | Recruitment rate of $P_L$ per unit nutrient    | $r_L < r_N$                         | Per unit nutrient per unit time | 5.0           |
| $r_N$    | Recruitment rate of $P_N$ per unit nutrient    |                                     |                                 | 500.0         |
| $b_L$    | Individual biomass (nutrient content) of $P_L$ | $b_L, b_N < T_N$                    | Unit nutrient                   | 0.2           |
| $b_N$    | Individual biomass (nutrient content) of $P_N$ |                                     |                                 | 0.2           |
| $a_L$    | Nutrient uptake coefficient of $P_L$           | Negligible                          | Per unit nutrient per unit time | 0.0           |
| $a_N$    | Nutrient uptake coefficient of $P_N$           |                                     |                                 | 0.0           |
| $m_P$    | Mortality rate of plants                       | $m_{MR}, m_{MS} > m_P$              | Per unit time                   | 0.01          |
| $f_L$    | Fraction of $D_R$ in detritus of $P_L$         | $0 \leq f_L, f_N \leq 1$            | Dimensionless                   | Changing      |
| $f_N$    | Fraction of $D_R$ in detritus of $P_N$         |                                     |                                 | Changing      |
| $c_D$    | Decomposition coefficient                      | —                                   | Dimensionless                   | 1.0           |
| $k_{RR}$ | Decomposition efficiency of $D_R$ by $M_R$     | Normalized as 1.0                   | Per unit nutrient per unit time | 1.0           |
| $k_{RS}$ | Decomposition efficiency of $D_R$ by $M_S$     | $k_{RR} > k_{RS} > k_{SS} > k_{SR}$ |                                 | 0.5           |
| $k_{SR}$ | Decomposition efficiency of $D_S$ by $M_R$     |                                     |                                 | 0.1           |
| $k_{SS}$ | Decomposition efficiency of $D_S$ by $M_S$     |                                     |                                 | 0.2           |
| $e_{MR}$ | Nutrient assimilation efficiency of $M_R$      | Independent of litter quality       | Dimensionless                   | 0.6           |
| $e_{MS}$ | Nutrient assimilation efficiency of $M_S$      |                                     |                                 | 0.6           |
| $m_{MR}$ | Mortality rate of $M_R$                        | $m_{MR}, m_{MS} > m_P$              | Per unit time                   | 0.1           |
| $m_{MS}$ | Mortality rate of $M_S$                        |                                     |                                 | 0.1           |
| $T_N$    | Total nutrient in the model ecosystem          | Normalized as 1.0                   | Unit nutrient                   | 1.0           |

**Table S2. Summary of conditions for persistence, microbial coexistence, and negative PSF**

|                                                                        |                                                                                                                                                                                                                                                                                                                                                                        |
|------------------------------------------------------------------------|------------------------------------------------------------------------------------------------------------------------------------------------------------------------------------------------------------------------------------------------------------------------------------------------------------------------------------------------------------------------|
| Persistent condition for a system with $P_i$ and $M_j$                 | $f_i > f_{P_i M_j}^E$ $i = L$ and $N$ , $j = R$ and $S$ .                                                                                                                                                                                                                                                                                                              |
| Persistent conditions for a system with $P_i$ , $M_R$ , and $M_S$      | $\frac{(k_{RR} - k_{SR})m'_{MS} - (k_{RS} - k_{SS})m'_{MR}}{c_D(k_{RR}k_{SS} - k_{RS}k_{SR})} < T_N - \frac{m_P}{r_i}$<br>$k_{SS}m'_{MR} - k_{SR}m'_{MS} > 0$ and $-k_{RS}m'_{MR} + k_{RR}m'_{MS} > 0$<br>$f_{M_R \rightarrow P_i M_S}^{**} < f_{M_S \rightarrow P_i M_R}^{**}$                                                                                        |
| Condition for negative PSF in a system with $P_i$ and $M_j$            | $f_L < f_{P_N \rightarrow P_i M_j}^{**}$ and $f_{P_L \rightarrow P_N M_j}^{**} < f_N$                                                                                                                                                                                                                                                                                  |
| Conditions for negative PSF in a system with $P_i$ , $M_R$ , and $M_S$ | $f_L > f_{P_N \rightarrow P_i M_R M_S}^{**}$ and $f_N < f_{P_L \rightarrow P_N M_R M_S}^{**}$ if $m'_{MR} < m'_{MS}$<br>$\Phi_{P_N \rightarrow P_i M_R M_S}^{**} < 0$ and $\Phi_{P_L \rightarrow P_N M_R M_S}^{**} < 0$ if $m'_{MR} = m'_{MS}$<br>$f_L < f_{P_N \rightarrow P_i M_R M_S}^{**}$ and $f_N > f_{P_L \rightarrow P_N M_R M_S}^{**}$ if $m'_{MR} > m'_{MS}$ |
| Coexistence condition for microbes in a system with $P_i$              | $f_{M_R \rightarrow P_i M_S}^{**} < f_{M_S \rightarrow P_i M_R}^{**}$ and $f_{M_R \rightarrow P_i M_S}^{**} < f_i < f_{M_S \rightarrow P_i M_R}^{**}$ and $i = L$ and $N$                                                                                                                                                                                              |

Persistent conditions, conditions for causing negative PSF in a system with a single microbial group or in a system with two microbial groups, and the condition for microbes to coexist are shown. Note that  $m'_{M_j} \equiv m_{M_j}/e_{M_j}$ . The exact mathematical expression for each threshold value is summarized in Table S3, also noting that  $\Phi_{P_N \rightarrow P_i M_R M_S}^{**}$  and  $\Phi_{P_L \rightarrow P_N M_R M_S}^{**}$  do not include  $f_L$  and  $f_N$  (Table S3).

**Table S3. Summary of the threshold litter decomposability and additional conditions**

| Symbol                                    | Definition                                                                                                                                                                                                                                                                                             |
|-------------------------------------------|--------------------------------------------------------------------------------------------------------------------------------------------------------------------------------------------------------------------------------------------------------------------------------------------------------|
| $f_{P_i M_j}^E$                           | $\frac{k_{Rj}k_{Sj}}{k_{Rj} - k_{Sj}} \left( \frac{1}{k_{Sj}} - \left( T_N - \frac{m_P}{r_i} \right) \frac{c_D}{m'_{Mj}} \right)$                                                                                                                                                                      |
| $f_{P_N \rightarrow P_i M_j}^{**}$        | $\frac{k_{Rj}k_{Sj}}{k_{Rj} - k_{Sj}} \left[ \frac{1}{k_{Sj}} + \frac{c_D}{m'_{Mj}} \left\{ -T_N - \frac{a_L}{r_L} + \frac{r_N m_P}{r_L^2} \left( 1 + \frac{a_L}{m'_{Mj}} \right) + b_L \left( 1 - \frac{r_L}{r_N} \right) \left( 1 + \frac{m_P}{m'_{Mj}} \right) \right\} \right]$                    |
| $f_{P_L \rightarrow P_N M_j}^{**}$        | $\frac{k_{Rj}k_{Sj}}{k_{Rj} - k_{Sj}} \left[ \frac{1}{k_{Sj}} + \frac{c_D}{m'_{Mj}} \left\{ -T_N - \frac{a_N}{r_N} + \frac{m_P}{r_L} \left( 1 + \frac{a_N}{m'_{Mj}} \right) + b_N \left( 1 - \frac{r_L}{r_N} \right) \left( 1 + \frac{m_P}{m'_{Mj}} \right) \right\} \right]$                          |
| $\Phi_{P_N \rightarrow P_i M_R M_S}^{**}$ | $-\frac{k_{RR} - k_{RS}}{-k_{RS}m'_{MR} + k_{RR}m'_{MS}} + \frac{r_L^2 r_N}{m_P(a_L r_N + b_L r_L^2)(r_N - r_L)} \left\{ T_N - \frac{r_N m_P}{r_L^2} - b_L \left( 1 - \frac{r_L}{r_N} \right) - \frac{(k_{RR} - k_{SR})m'_{MS} - (k_{RS} - k_{SS})m'_{MR}}{c_D(k_{RR}k_{SS} - k_{RS}k_{SR})} \right\}$ |
| $\Phi_{P_L \rightarrow P_N M_R M_S}^{**}$ | $\frac{k_{RR} - k_{RS}}{-k_{RS}m'_{MR} + k_{RR}m'_{MS}} - \frac{r_L r_N}{m_P(a_N + b_N r_L)(r_N - r_L)} \left\{ T_N - \frac{m_P}{r_L} - b_N \left( 1 - \frac{r_L}{r_N} \right) - \frac{(k_{RR} - k_{SR})m'_{MS} - (k_{RS} - k_{SS})m'_{MR}}{c_D(k_{RR}k_{SS} - k_{RS}k_{SR})} \right\}$                |
| $f_{P_N \rightarrow P_i M_R M_S}^{**}$    | $\frac{(k_{SS}m'_{MR} - k_{SR}m'_{MS})(-k_{RS}m'_{MR} + k_{RR}m'_{MS})}{(k_{RR}k_{SS} - k_{RS}k_{SR})(m'_{MS} - m'_{MR})} \Phi_{P_N \rightarrow P_i M_R M_S}^{**}$                                                                                                                                     |
| $f_{P_L \rightarrow P_N M_R M_S}^{**}$    | $\frac{(k_{SS}m'_{MR} - k_{SR}m'_{MS})(-k_{RS}m'_{MR} + k_{RR}m'_{MS})}{(k_{RR}k_{SS} - k_{RS}k_{SR})(m'_{MS} - m'_{MR})} (-\Phi_{P_L \rightarrow P_N M_R M_S}^{**})$                                                                                                                                  |
| $f_{M_R \rightarrow P_i M_S}^{**}$        | $\frac{k_{SS}k_{RS}}{k_{RR}k_{SS} - k_{RS}k_{SR}} \left( \frac{m'_{MR}}{m'_{MS}} - \frac{k_{SR}}{k_{SS}} \right)$                                                                                                                                                                                      |
| $f_{M_S \rightarrow P_i M_R}^{**}$        | $\frac{k_{RR}k_{SR}}{k_{RR}k_{SS} - k_{RS}k_{SR}} \left( \frac{k_{SS}}{k_{SR}} - \frac{m'_{MS}}{m'_{MR}} \right)$                                                                                                                                                                                      |

These threshold values determine the possibility of the coexistence of plants and microbes (Table S2) where  $m'_{M_j} \equiv m_{M_j}/e_{M_j}$ .
